# Supplementary material for: The Herbaspirillum seropedicae SmR1 Fnr orthologs controls the cytochrome composition of the electron transport chain
Source: PubMed Central journal article supplement — Sci Rep. 2013 Sep 2;3:2544. doi: 10.1038/srep02544 (PMC3759049; doi:10.1038/srep02544), 2013-09-02
Supplement: srep02544-s1.pdf [file srep02544-s1.pdf]

**SUPPLEMENTARY INFORMATION FOR:**

**The *Herbaspirillum seropedicae* SmR1 Fnr orthologs controls  
the cytochrome composition of the electron transport chain**

Marcelo B. Batista<sup>a</sup>, Michelle Z. T. Sfeir<sup>a</sup>, Helisson Faoro<sup>a</sup>, Roseli Wassem<sup>b</sup>, Maria B. R. Steffens<sup>a</sup>, Fábio O. Pedrosa<sup>a</sup>, Emanuel M. Souza<sup>a</sup>, Ray Dixon<sup>c</sup> and Rose A. Monteiro<sup>a\*</sup>.

<sup>a</sup> Department of Biochemistry and Molecular Biology, UFPR, Curitiba-PR – Brazil

<sup>b</sup> Department of Genetics, UFPR, Curitiba-PR - Brazil

<sup>c</sup> Department of Molecular Microbiology, John Innes Centre, Colney Lane, Norwich NR4 7UH, UK

\*corresponding author:

Rose Adele Monteiro : [roseadele@ufpr.br](mailto:roseadele@ufpr.br)

**Contents:**

- **Supplementary Figures**
- **Supplementary Tables**
- **Supplementary References**

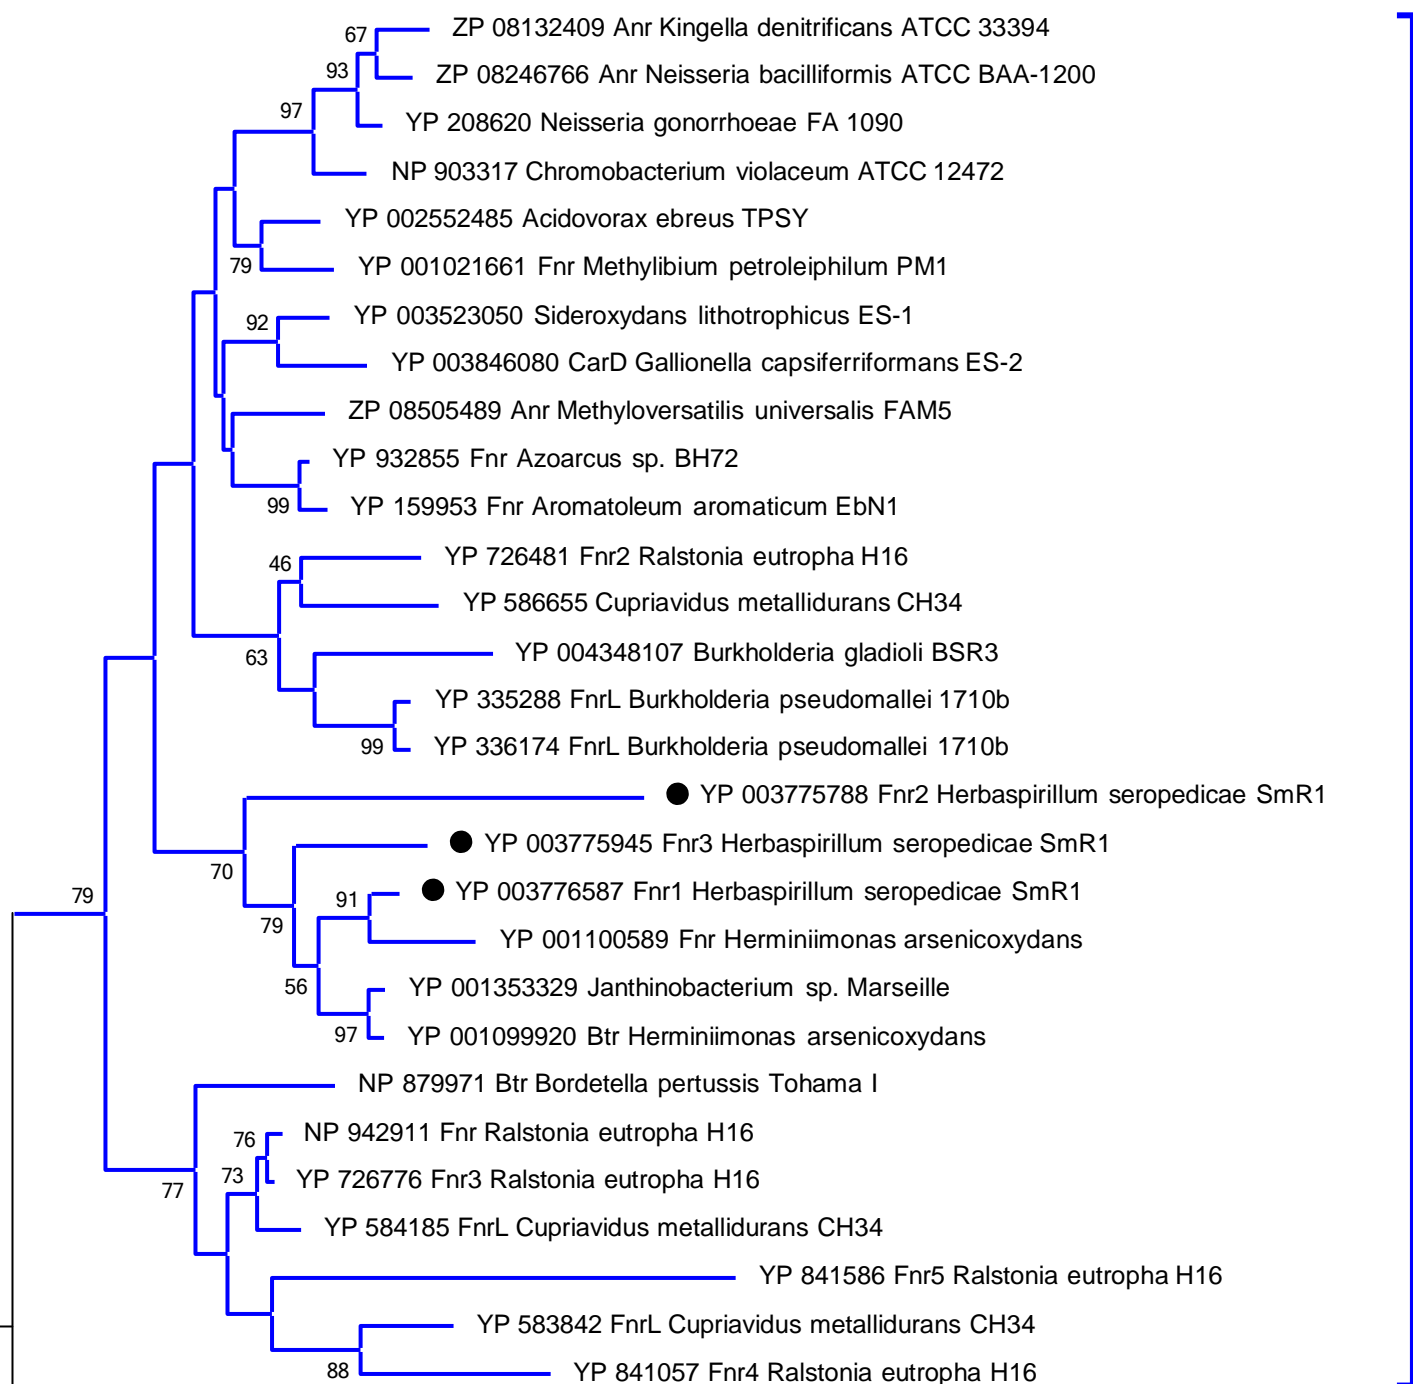

Betaproteobacteria

Fnr Group

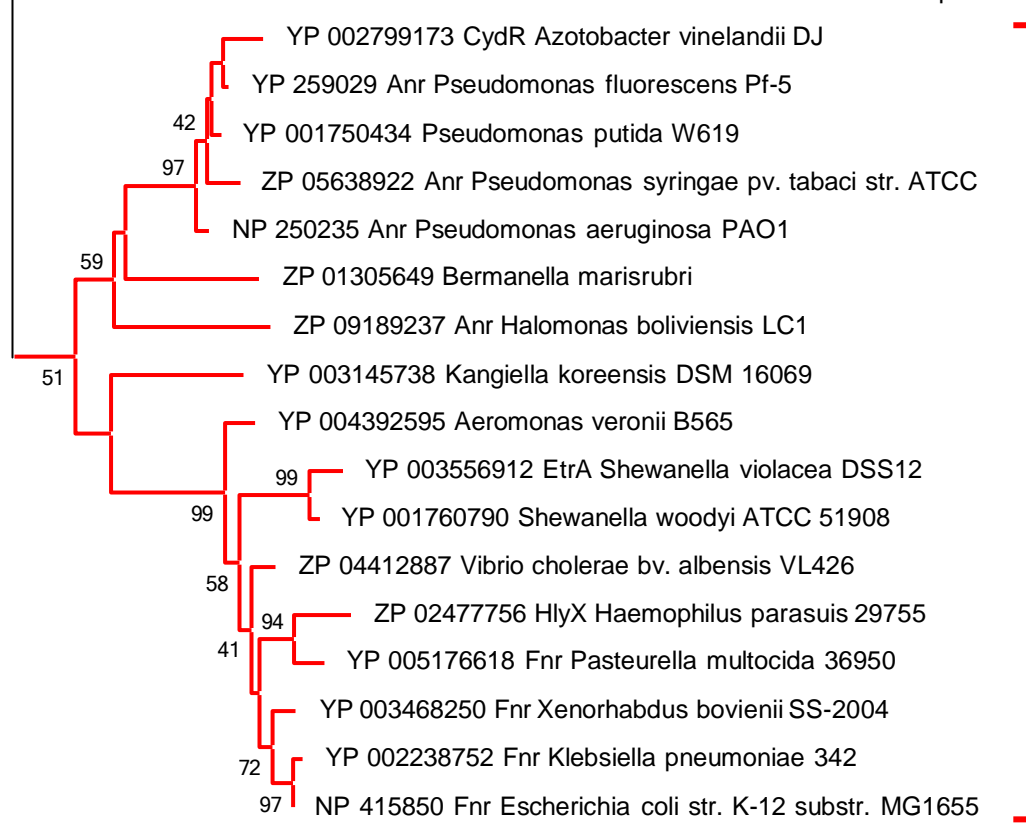

Gammaproteobacteria

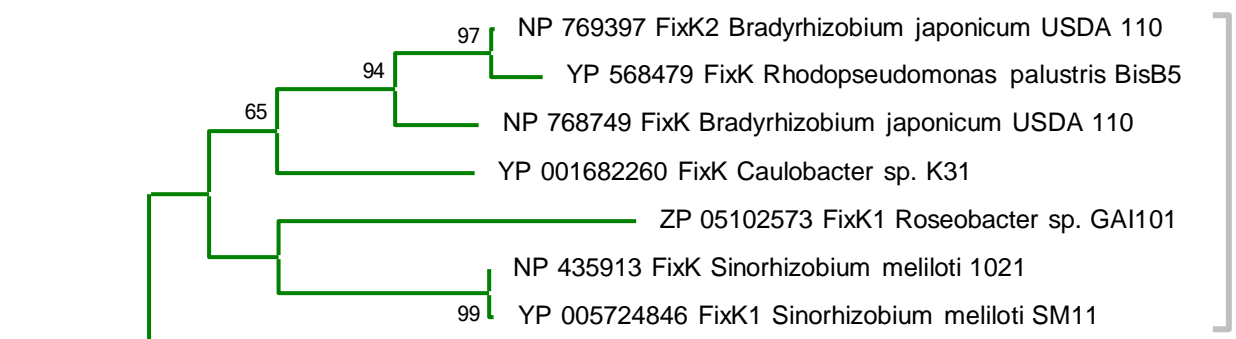

FixK Group

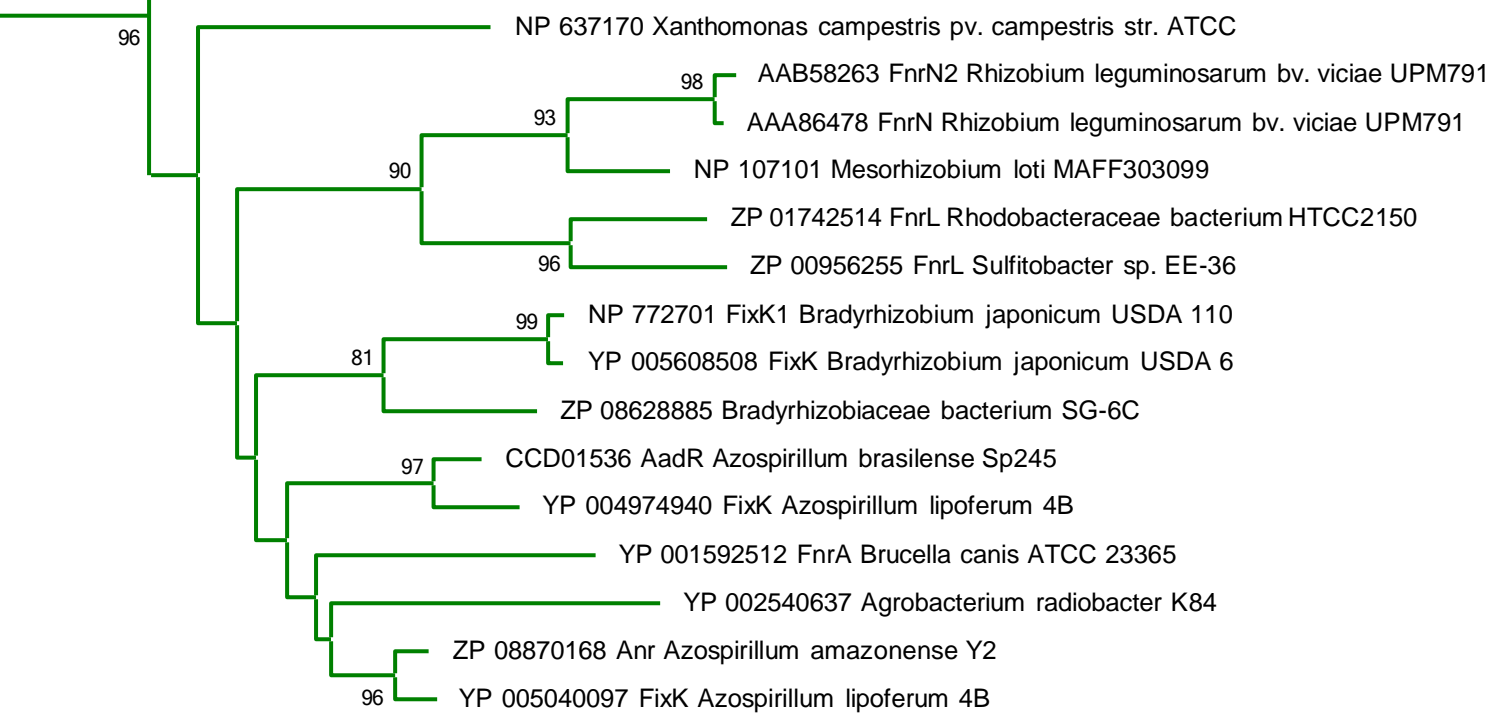

Alphaproteobacteria

FnrN Group

**Supplementary Figure S1:** Phylogenetic reconstruction of selected members of Fnr, FnrN and FixK groups of the CRP-FNR superfamily of transcriptional regulators. The unrooted, maximum-likelihood tree was constructed as described in the methods section. The tree with the highest log likelihood (-12984.9076) is shown. The members of the tree are identified by the NCBI Reference sequence identification number and by the name of the host bacterium. Drawings are to scale, with branch lengths measured in the number of substitutions per site. The analysis involved 68 amino acid sequences. All positions containing gaps and missing data were eliminated. The branches of Alpha, Gamma and Betaproteobacteria are differentiated by the following colors: green, red and blue, respectively. *H. seropedicae* Fnr proteins are indicated with closed circles.

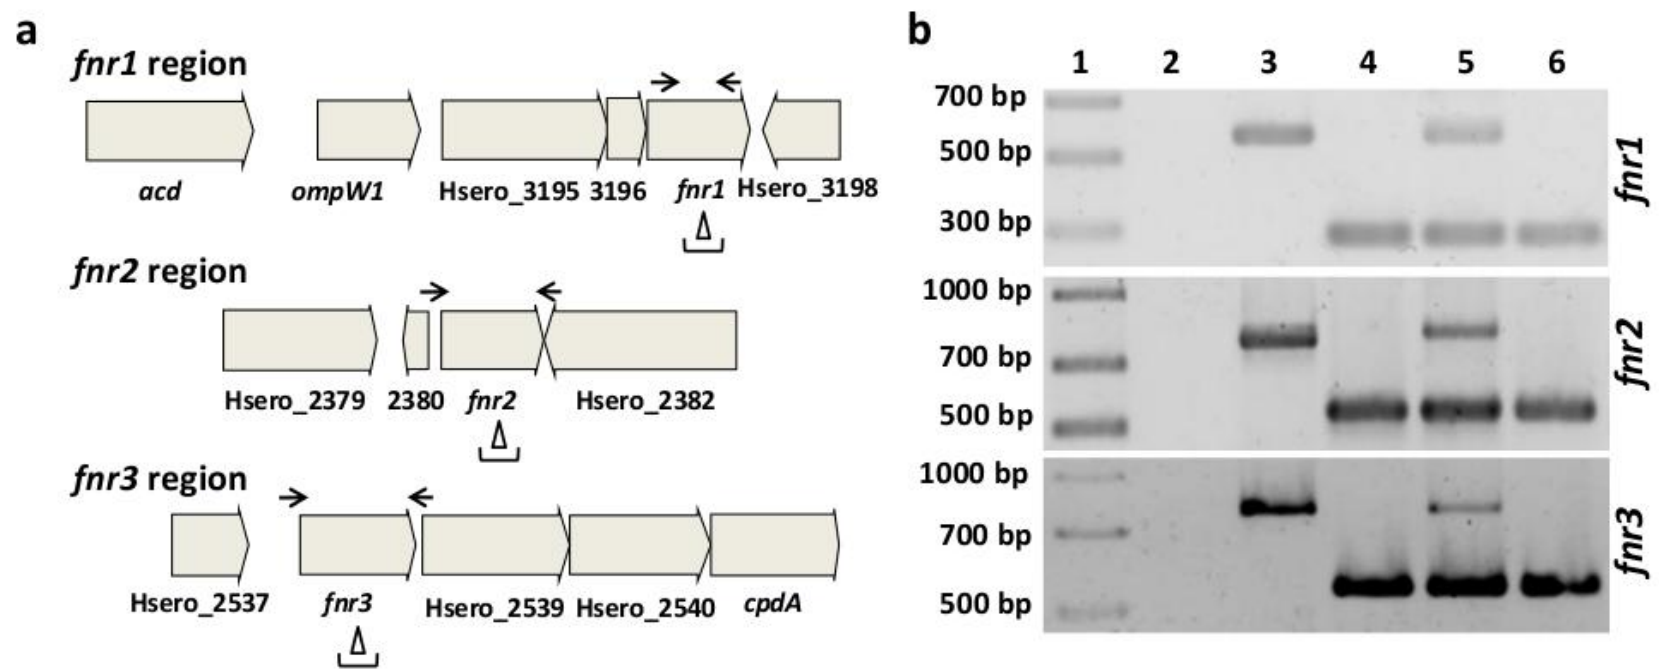

**Supplementary Figure S2:** Construction and validation of the *fnr1*, *fnr2* and *fnr3* mutant strains. (a) Chromosomal regions encoding *fnr1*, *fnr2* and *fnr3*. The genes and predicted functions in the *fnr1* locus are: *acd*, 1-aminocyclopropane-1-carboxylate deaminase; *ompW1*, outer membrane W protein; Hsero\_3195, fatty acid desaturase protein; Hsero\_3196 hypothetical protein; Hsero\_3198, transmembrane protein. The genes and predicted functions in the *fnr2* locus are: Hsero\_2379, AraC family transcription regulator protein; Hsero\_2380, hypothetical protein; Hsero\_2382, acyltransferase family protein. The genes and predicted functions in the *fnr3* locus are: Hsero\_2537, nicotinamidase protein; Hsero\_2539, type 2 phosphatidic acid phosphatase family protein; Hsero\_2540, sphingosine kinase/eukaryotic diacylglycerol kinase protein; *cpdA*, 3'5' cyclic-nucleotide phosphodiesterase protein. The regions deleted in *fnr1*, *fnr2* and *fnr3* are indicated by Δ, as well the primers used for PCR genotyping are indicating by thin arrows external to the genes. (b) Genotypic validation of strains MB1 (*fnr1* deletion), MB2 (*fnr2* deletion) and MB3 (*fnr3* deletion). PCR was performed by using primers external to the targeted gene (as indicated in A). Lanes: 1, 1 Kb ladder Axygen; 2, water control; 3, SmR1; 4, suicide vector (pMBB1DS, pMBB2DS or pMBB3DS); 5, intermediate strain; 6, final deletion strain. Double and triple mutants were genotyped in the same fashion. On the left are indicated the length in base pairs (bp) of the DNA ladder.

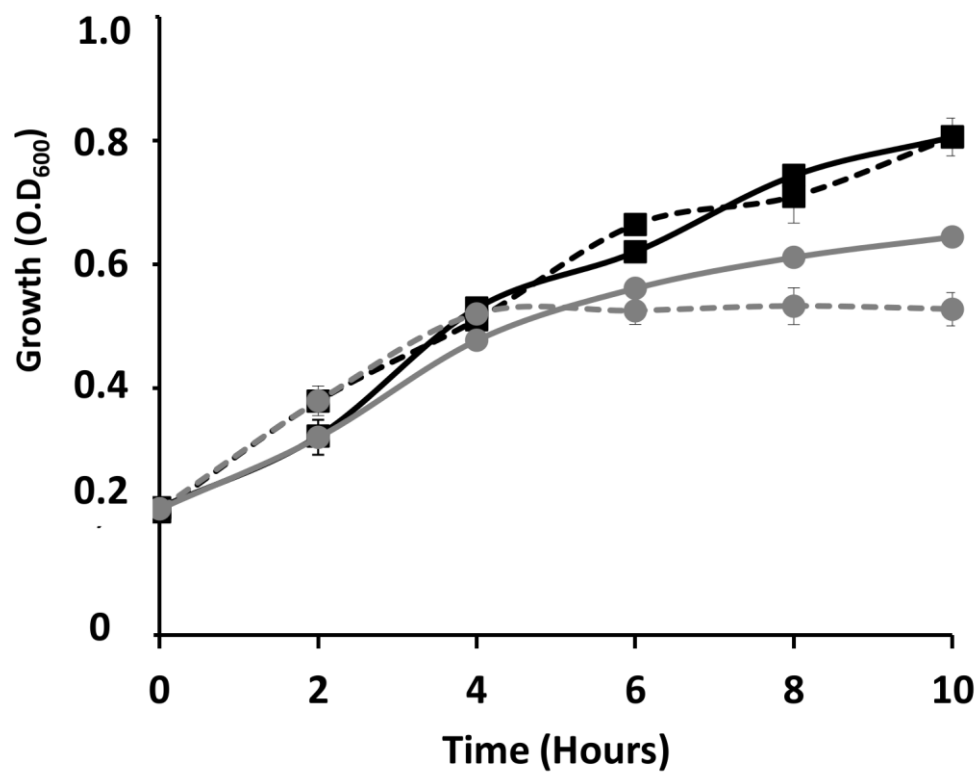

**Supplementary Figure S3:** Influence of *fnr* genes on growth under combined nitrogen and oxygen limitation. The growth of SmR1 (black squares) and MB231 (grey circles) were assayed in NFbHP-Malate minimal media supplemented with high (filled line) ammonium concentration (20mM NH<sub>4</sub>Cl) or low (dotted lines) ammonium concentration (2mM NH<sub>4</sub>Cl). The data represents the mean of three independent assays performed in duplicate. Error bars indicate standard deviations. In some case these are not visible as they are smaller than the graph points.

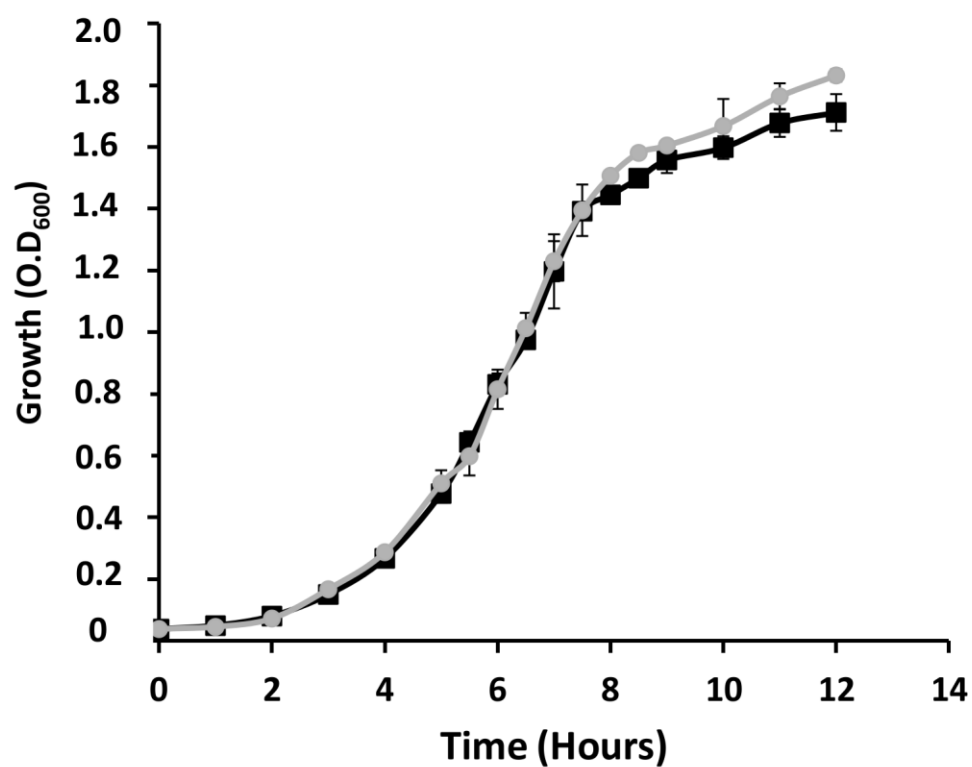

**Supplementary Figure S4:** Deletion of the three *fnr* genes does not affect growth under 20.8% oxygen. The growth of SmR1 (black squares) and MB231 (grey circles) were assayed in NFbHP-Malate minimal media supplemented with 20 mM ammonium chloride under air (20,8% oxygen). The data represents the mean of two independent assays performed in duplicate. Error bars indicate standard deviations. In some cases these are not visible as they are smaller than the graph points.

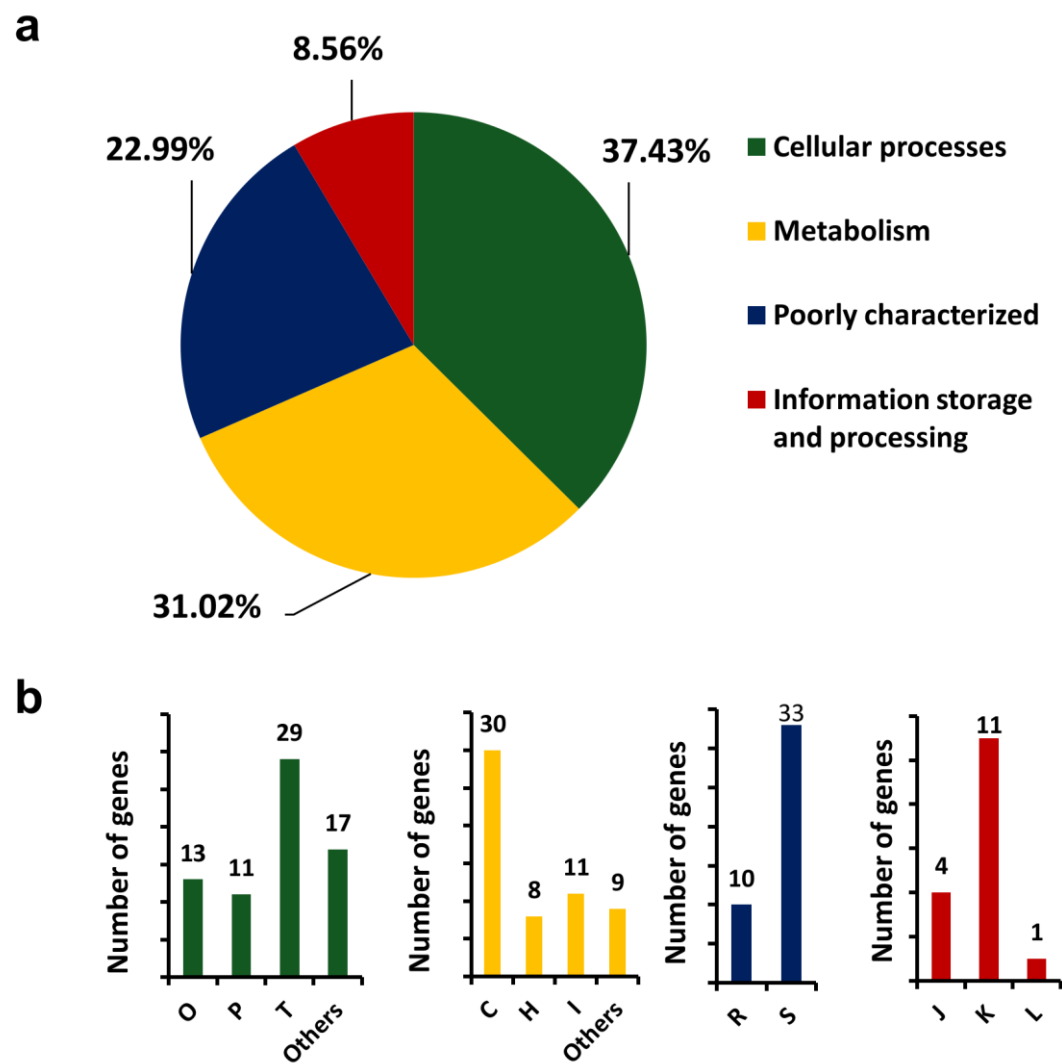

**Supplementary Figure S5:** Functional COG classification of all differentially expressed genes revealed by comparison of the RNA-Seq libraries of *H. seropedicae* MB231 (*fnr* ablated strain) and SmR1 (wild type) strains. (a) Distribution of regulated genes into four general categories. The categories were classified according to its abundance in the clockwise direction. (b) Detailed distribution of the most representative functional categories in the data. The letters referring to each specific category are: O, post-translational modification; protein turnover, chaperone functions; P, Inorganic ion transport and metabolism; T, signal transduction; C, energy production and conversion; H, coenzyme metabolism; I, lipid metabolism; R, general functional prediction only; S, function unknown; J, translation; K, transcription; L, replication and repair.

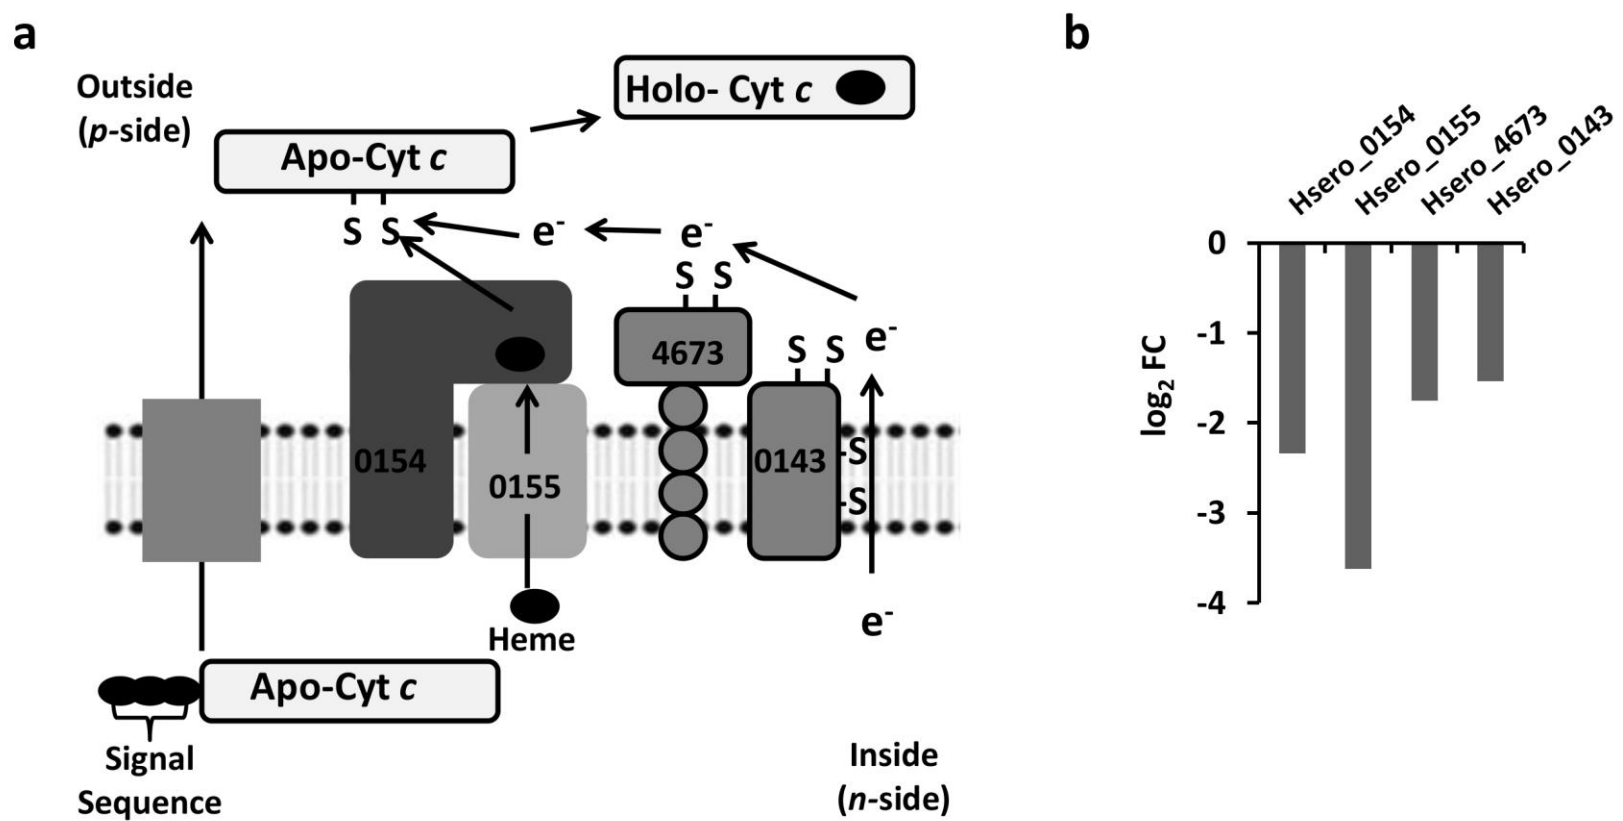

**Supplementary Figure S6:** The System II (CCS - C y t c S y n t h e s i s i s) for cytochrome *c* maturation pathway in *H. seropedicae*. (a) Schematic representation of cytochrome *c* maturation based on genes present in the genome. The genes and predicted functions are: Hsero\_0154: *resB* cytochrome *C*-type biogenesis transmembrane protein; Hsero\_0155: *ccmC* (*resC*) ABC-type transport system, permease component protein; Hsero\_4673: Hsero\_4673 (*resA*) thioredoxin protein; Hsero\_0143: *dsbD* thiol:disulfide interchange transmembrane protein. (b) Level of differential expression of genes coding for components of CCS. The genes were down regulated in the MB231 strain, indicating that they are Fnr activated. FC means fold change.

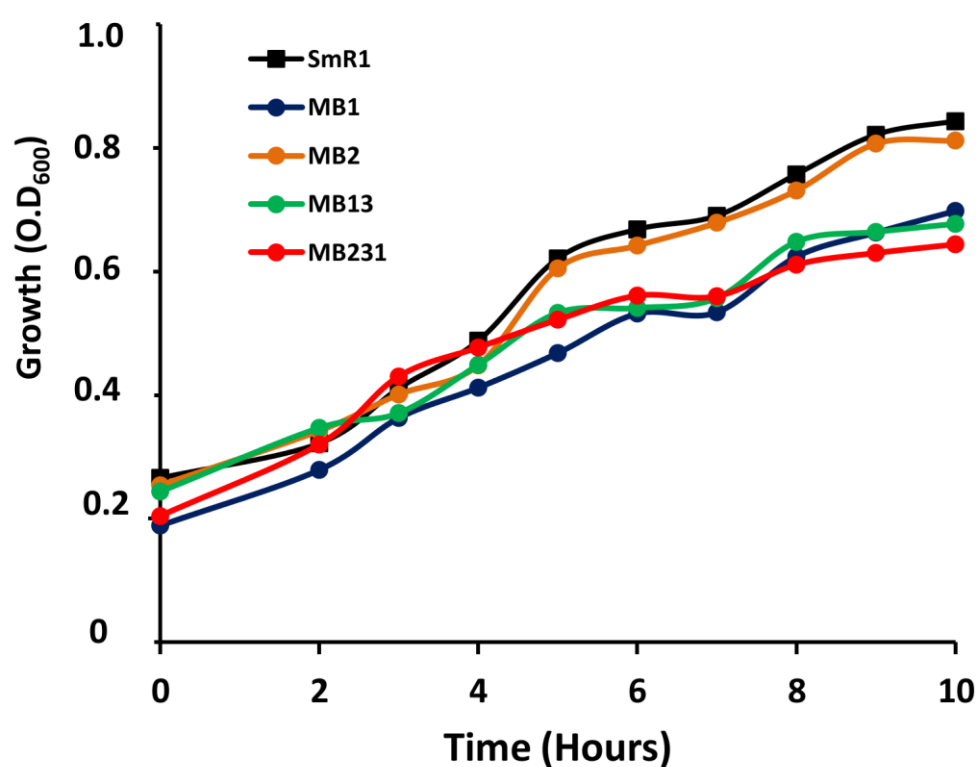

**Supplementary Figure S7:** The Fnr2 protein is not required for growth under oxygen-limiting conditions. The growth of SmR1 (black squares), MB1 (blue circles), MB2 (orange circles), MB13 (green circles) and MB231 (red circles) were assayed in NFbHP-Malate minimal media supplemented with 20 mM ammonium chloride under an oxygen concentration of 5.0 % in the gas phase of the culture flask.

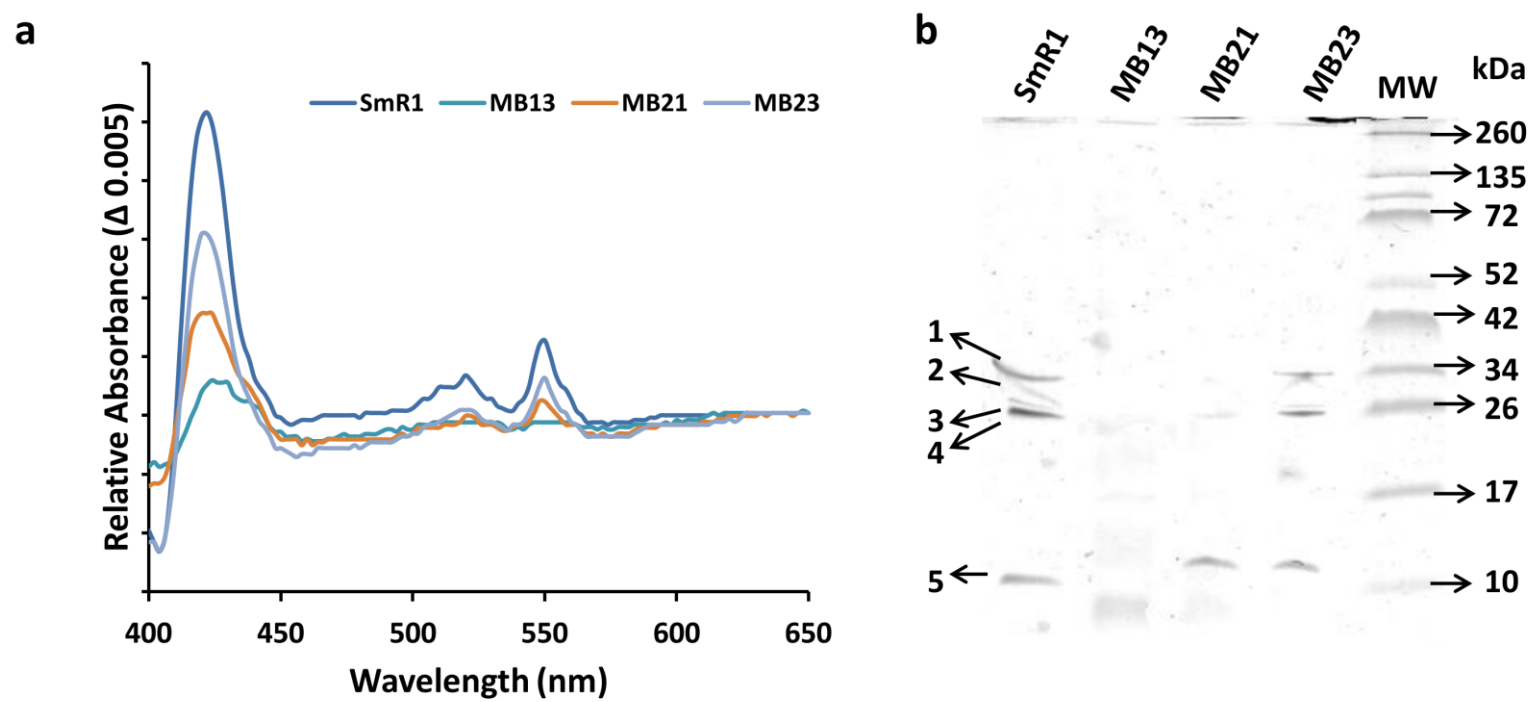

**Supplementary Figure S8:** The levels of *c*-type cytochromes in *H. seropedicae* strains MB13, MB21 and MB23 are similar to those of the strains, MB231, MB1 and MB3, respectively. (a) UV–visible reduced minus oxidized absorption spectra and (b) heme stain profile of protein extracts from *H. seropedicae* SmR1 (wild type), MB13, MB21 and MB23 mutant strains.

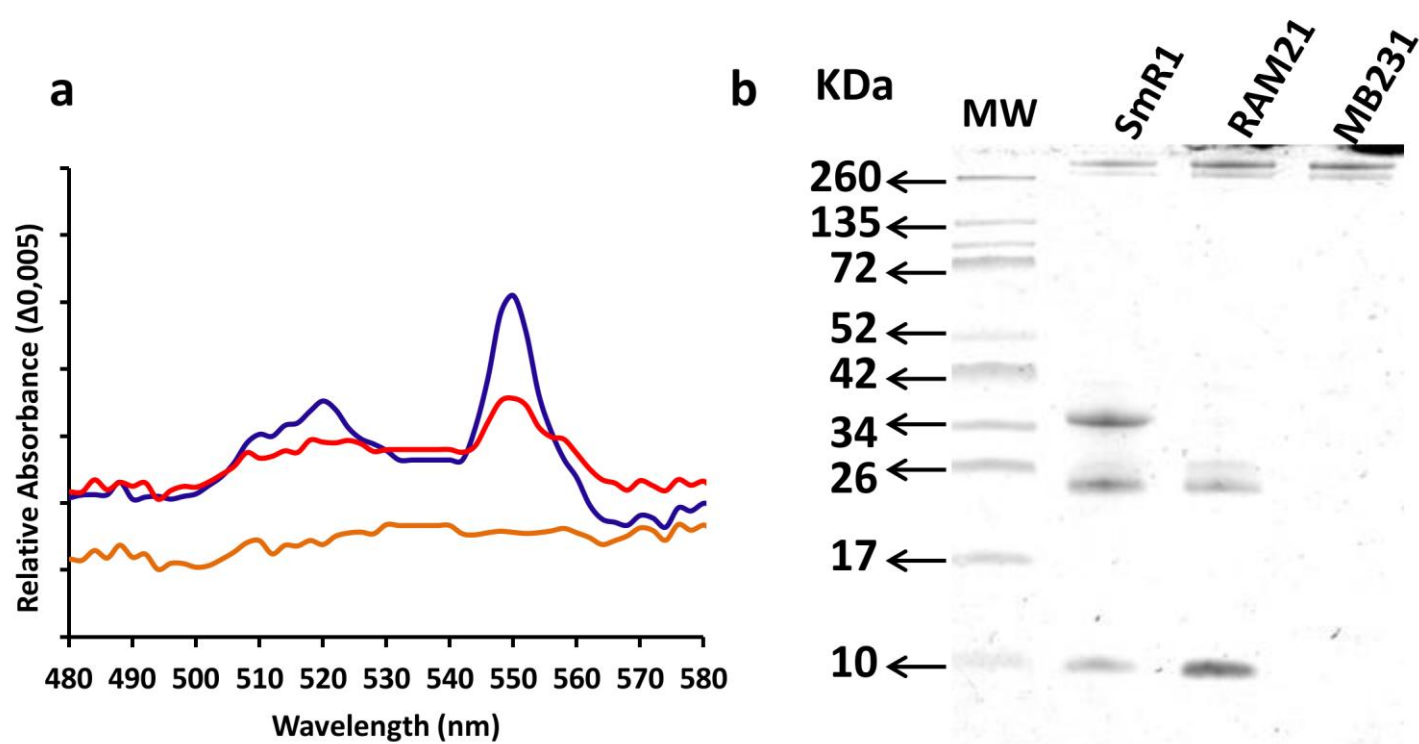

**Supplementary Figure S9.** The RAM21 strain is deficient in the levels of *c*-type cytochromes. (a) Reduced minus oxidized visible absorption spectra of protein extracts from *H. seropedicae* SmR1 (blue), RAM21 (red) and MB231 (orange) strains. The UV–visible difference spectra of  $0.3 \text{ mg}\cdot\text{mL}^{-1}$  protein extracts was recorded as described in Methods. (b) Heme stain profile of protein extracts from *H. seropedicae* SmR1 (wild type), RAM21 (*fixN* mutant) and MB231 (triple *fnr* mutant) strains. Samples ( $50 \mu\text{g}$  protein per lane) from all the strains were separated by 10% Tris-Tricine SDS-PAGE and stained for covalently bound heme with *o*-dianisidine as described in Methods.



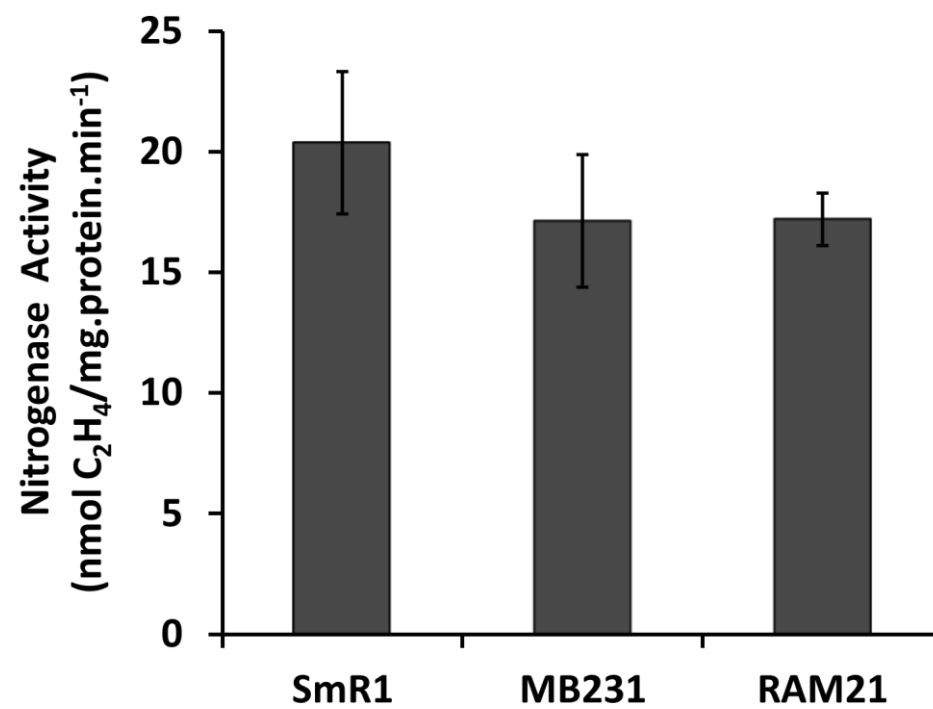

**Supplementary Figure S10.** Influence of Fnr and FixN on nitrogenase activity in semi solid media. The acetylene reduction assay was performed as described in Methods using strains grown in semi-solid medium supplemented with 0.5 mM of sodium glutamate. Data represent the average of two independent experiments performed in duplicate. Error bars indicate standard deviations.

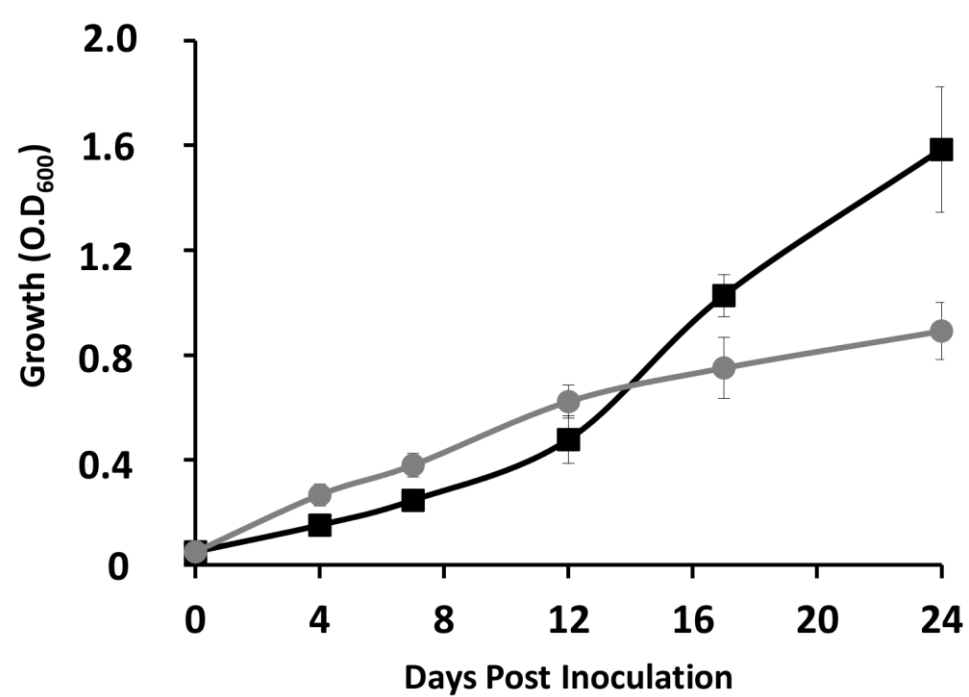

**Supplementary Figure S11:** Influence of *fnr* genes deletion on diazotrophic growth. The SmR1 (black squares) and MB231 (grey circles) strains were collected by centrifugation, washed with NFbHP-Malate minimal media without addition of nitrogen source and resuspended back in the same media to an initial optical density of 0.05. Strains were incubated statically at 30°C. In some cases error bars are not visible as they are smaller than the graph points.

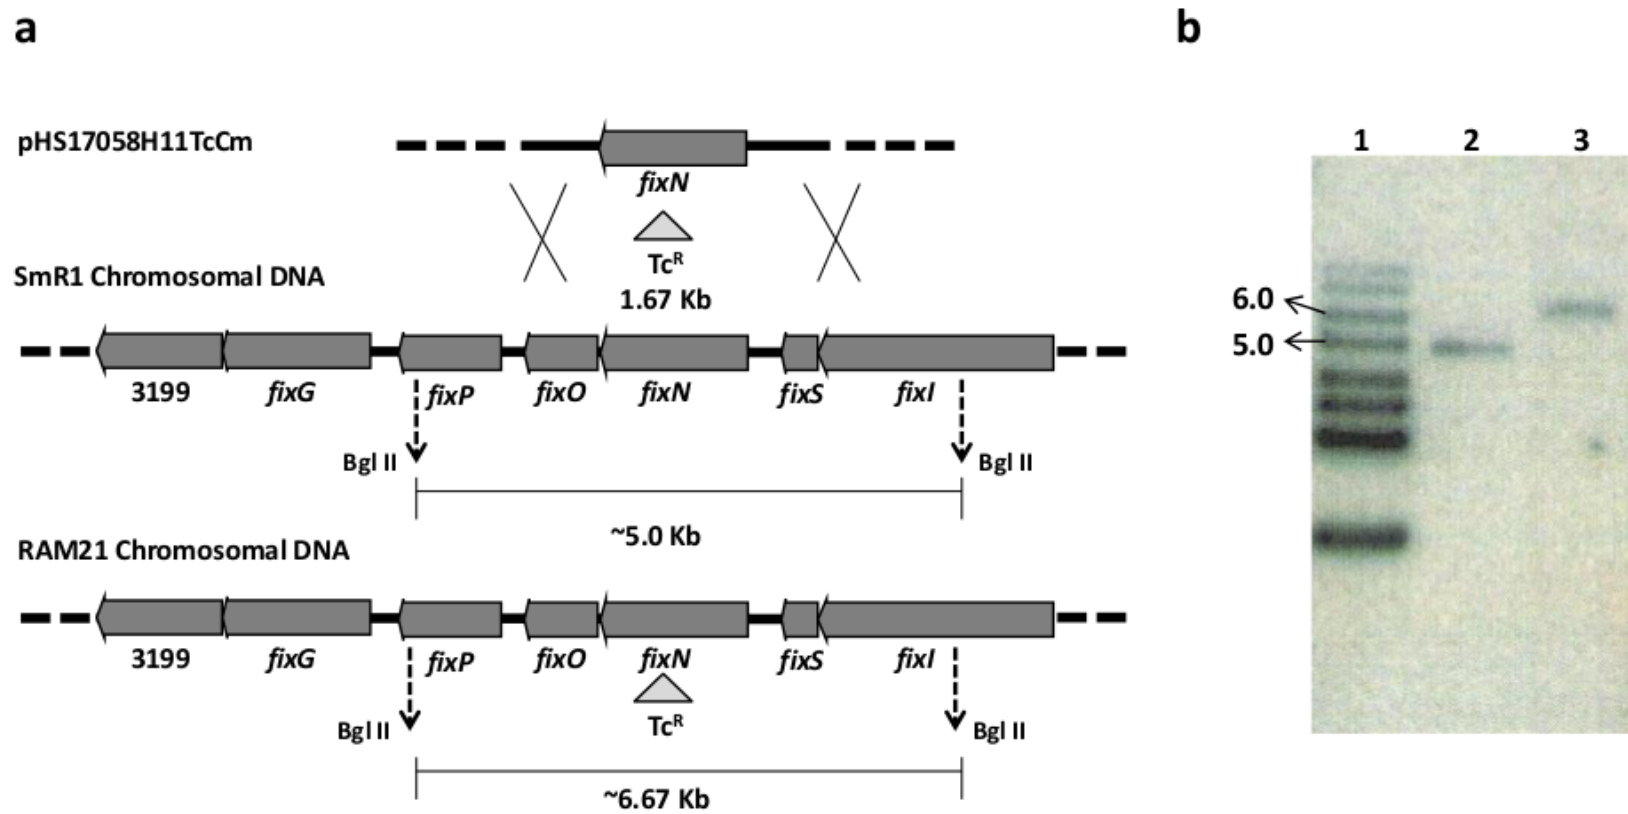

**Supplementary Figure S12:** Construction and validation of the *fixN* mutant strain. (a) Schematic representation of the mutagenic plasmid (pHS17058H11TcCm) and its integration into *H. seropedicae* SmR1 *fixN* chromosomal region. The genes and predicted functions in the locus are: Hsero\_3199, FixH domain containing protein; *fixG*, iron-sulfur 4Fe-4S ferredoxin transmembrane protein; *fixP*, *cbb<sub>3</sub>*-type cytochrome c oxidase-subunit III; *fixO*, *cbb<sub>3</sub>*-type cytochrome oxidase-subunit II; *fixN*, *cbb<sub>3</sub>*-type cytochrome c oxidase, subunit I; *fixS*, nitrogen fixation protein P-type ATPase protein; *fixI*, cation transport P-type ATPase protein. Genes are not drawn to scale. (b) Genotypic validation of RAM21 strain (insertion of Tc<sup>R</sup> transposon into *fixN* gene) by DNA hybridization using a specific *fixN* probe. Lanes: 1, 1 Kb ladder (Fermentas); 2, *H. seropedicae* SmR1 chromosomal DNA digested with Bgl II; 3, *H. seropedicae* RAM21 chromosomal DNA digested with Bgl II. On the left are indicated the length in kilobase pairs of the DNA ladder.

**Supplementary Table S1: Strains and plasmids used in this study**

| Strains and Plasmids  | Relevant Characteristic                                                                                             | Source or Reference |
|-----------------------|---------------------------------------------------------------------------------------------------------------------|---------------------|
| <i>E. coli</i>        |                                                                                                                     |                     |
| TOP 10                | <i>hsdR</i> , <i>mcrA</i> , <i>lacZ</i> ΔM15, <i>recA</i>                                                           | INVITROGEN          |
| S17.1                 | Sm <sup>R</sup> , Tra <sup>+</sup>                                                                                  | (3)                 |
| <i>H. seropedicae</i> |                                                                                                                     |                     |
| SmR1                  | Z78 but Sm <sup>R</sup> 100μg/mL, Nif <sup>+</sup>                                                                  | (4)                 |
| MB1                   | Same as SmR1, but with a deletion at <i>fnr1</i> gene                                                               | This work           |
| MB2                   | Same as SmR1, but with a deletion at <i>fnr2</i> gene                                                               | This work           |
| MB3                   | Same as SmR1, but with a deletion at <i>fnr3</i> gene                                                               | This work           |
| MB13                  | Same as SmR1, but with deletions at <i>fnr1</i> and <i>fnr3</i> genes                                               | This work           |
| MB21                  | Same as SmR1, but with deletions at <i>fnr2</i> and <i>fnr1</i> genes                                               | This work           |
| MB23                  | Same as SmR1, but with deletions at <i>fnr2</i> and <i>fnr3</i> genes                                               | This work           |
| MB231                 | Same as SmR1, but with deletions at <i>fnr1</i> , <i>fnr2</i> and <i>fnr3</i> genes                                 | This work           |
| RAM21                 | Same as SmR1, but with insertion of a TET-1 transposon at <i>fixN</i> gene                                          | This work           |
| Plasmids              |                                                                                                                     |                     |
| pTZ57R/T              | Amp <sup>R</sup> , TA cloning vector                                                                                | FERMENTAS           |
| pSUP202               | Cb <sup>R</sup> , Cm <sup>R</sup> , Tc <sup>R</sup> , Mob                                                           | (3)                 |
| pMH1701               | Km <sup>R</sup> , contains the <i>nptI-sacR-sacB</i> cassette                                                       | (5)                 |
| pPW452                | Same as pMP220, but with inverted cloning site                                                                      | (6)                 |
| pTnMod-OCm            | pMB1, Cam <sup>R</sup> mob+ Tn5 tnp                                                                                 | (7)                 |
| pHS17058H11           | pUC18 derivative plasmid from <i>H. seropedicae</i> SmR1 genomic sequencing library containing the <i>fixN</i> gene | (8)                 |
| pHS17058H11Tc         | Same as pHS17058H11 with the TET-1 transposon inserted at the <i>fixN</i> gene                                      | This work           |
| pHS17058H11TcCm       | Same as pHS17058H11Tc with the Cam <sup>R</sup> cassette (from pTnMod-Com) inserted outside the <i>fixN</i> gene    | This work           |
| pTZFNR1A              | Contains 198 bp upstream to <i>fnr1</i> plus 294 bp of the 5' coding region in pTZ57R/T vector.                     | This work           |
| pTZFNR1B              | Contains 245 bp downstream to <i>fnr1</i> plus 255 bp of the 3' coding region in pTZ57R/T vector                    | This work           |
| pTZFNR2A              | Contains 333 bp upstream to <i>fnr2</i> plus 279 bp of the 5' coding region in pTZ57R/T vector                      | This work           |
| pTZFNR2B              | Contains 357 bp downstream to <i>fnr2</i> plus 273 bp of the 3' coding region in pTZ57R/T vector                    | This work           |

|            |                                                                                                                                |           |
|------------|--------------------------------------------------------------------------------------------------------------------------------|-----------|
| pTZFNR3A   | Contains 315 bp upstream to <i>fnr3</i> plus 255 bp of the 5' of the coding region in pTZ57R/T vector                          | This work |
| pTZFNR3B   | Contains 315 bb downstream to <i>fnr3</i> plus 264 pb of the 3' coding region in pTZ57R/T vector                               | This work |
| pTZFNR1DEL | Contains the XhoI and HindIII fragment of pTZFNR1A vector in pTZFNR1B to yield a plasmid with a 279 bp deletion in <i>fnr1</i> | This work |
| pTZFNR2DEL | Contains the XhoI and HindIII fragment of pTZFNR2A vector in pTZFNR2B to yield a plasmid with a 276 bp deletion in <i>fnr2</i> | This work |
| pTZFNR3DEL | Contains the XhoI and HindIII fragment of pTZFNR3A vector in pTZFNR3B to yield a plasmid with a 267 bp deletion in <i>fnr3</i> | This work |
| pMBB1D     | Contains the HindIII and BamHI fragment of pTZFNR1DEL vector in pSUP202 suicide vector                                         | This work |
| pMBB2D     | Contains the HindIII and BamHI fragment of pTZFNR2DEL vector in pSUP202 suicide vector                                         | This work |
| pMBB3D     | Contains the HindIII and BamHI fragment of pTZFNR3DEL vector in pSUP202 suicide vector                                         | This work |
| pMBB1DS    | Same as pMBB1D, but with the <i>nptI-sacR-sacB</i> cassette inserted at BamHI site                                             | This work |
| pMBB2DS    | Same as pMBB2D, but with the <i>nptI-sacR-sacB</i> cassette inserted at BamHI site                                             | This work |
| pMBB3DS    | Same as pMBB3D, but with the <i>nptI-sacR-sacB</i> cassette inserted at BamHI site                                             | This work |
| pTZPFN     | Contains the putative promoter region of <i>fixNOP</i> operon in pTZ57R/T vector                                               | This work |
| pTZPHN     | Contains the putative promoter region of <i>hemN-Hsero_3206-fixIS</i> operon in pTZ57R/T vector                                | This work |
| pPWPFN     | TcR, Mob, <i>fixN::lacZ</i> fusion, PstI and BglII fragment of pTZPFN in pPW452 vector                                         | This work |
| pPWPHN     | TcR, Mob, <i>hemN::lacZ</i> fusion, PstI and BglII fragment of pTZPHN in pPW452 vector                                         | This work |

Supplementary Table S2: Sequences Retrieved for Phylogenetic Analyses

| Class              | Clade     | Order | Ref seq <sup>a</sup> | Locus Tag <sup>b</sup> | Definition                                           | Gene        | Organism                                         |
|--------------------|-----------|-------|----------------------|------------------------|------------------------------------------------------|-------------|--------------------------------------------------|
| Betaproteobacteria | Fnr Group | 1     | ZP_08132409          | HMPREF9098_0136        | transcriptional regulator Anr                        | -           | <i>Kingella denitrificans</i> ATCC 33394         |
|                    |           | 2     | ZP_08246766          | HMPREF9123_0193        | transcriptional regulator Anr                        | -           | <i>Neisseria bacilliformis</i> ATCC BAA-1200     |
|                    |           | 3     | YP_208620            | NGO1579                | anaerobic transcriptional regulator                  | -           | <i>Neisseria gonorrhoeae</i> FA 1090             |
|                    |           | 4     | NP_903317            | CV_3647                | Crp/Fnr family transcriptional regulator             | -           | <i>Chromobacterium violaceum</i> ATCC 12472      |
|                    |           | 5     | YP_002552485         | Dtpsy_1007             | Crp/Fnr family transcriptional regulator             | -           | <i>Acidovorax ebreus</i> Tpsy                    |
|                    |           | 6     | YP_001021661         | Mpe_A2471              | transcription factor Fnr                             | <i>fnr</i>  | <i>Methylibium petroleiphilum</i> PM1            |
|                    |           | 7     | YP_003523050         | Slit_0422              | Crp/Fnr family transcriptional regulator             | -           | <i>Sideroxydans lithotrophicus</i> ES-1          |
|                    |           | 8     | YP_003846080         | Galf_0271              | CarD family transcriptional regulator                | <i>carD</i> | <i>Gallionella capsiferriformans</i> ES-2        |
|                    |           | 9     | ZP_08505489          | METUNv1_02552          | Transcriptional activator protein anr                | -           | <i>Methyloversatilis universalis</i> FAM5        |
|                    |           | 10    | YP_932855            | azo1351                | <i>fnr</i> gene product                              | -           | <i>Azoarcus</i> sp. BH72                         |
|                    |           | 11    | YP_159953            | ebA5149                | transcription factor Fnr                             | -           | <i>Aromatoleum aromaticum</i> EbN1               |
|                    |           | 12    | YP_726481            | H16_A2013              | transcriptional regulator, FNR-like                  | <i>fnr2</i> | <i>Ralstonia eutropha</i> H16                    |
|                    |           | 13    | YP_586655            | Rmet_4521              | Crp/Fnr family transcriptional regulator             | -           | <i>Cupriavidus metallidurans</i> CH34            |
|                    |           | 14    | YP_004348107         | bgla_2g01140           | Transcriptional regulator, Crp/Fnr family protein    | -           | <i>Burkholderia gladioli</i> BSR3                |
|                    |           | 15    | YP_335288            | BURPS1710b_A0129       | <i>fnrL</i> gene product                             | <i>fnrL</i> | <i>Burkholderia pseudomallei</i> 1710b           |
|                    |           | 16    | YP_336174            | BURPS1710b_A1016       | <i>fnrL</i> gene product                             | <i>fnrL</i> | <i>Burkholderia pseudomallei</i> 1710b           |
|                    |           | 17    | YP_003775788         | Hsero_2381             | Crp/Fnr family transcription regulator               | <i>fnr2</i> | <i>Herbaspirillum seropedicae</i> SmR1           |
|                    |           | 18    | YP_003775945         | Hsero_2538             | Crp/Fnr family transcription regulator               | <i>fnr3</i> | <i>Herbaspirillum seropedicae</i> SmR1           |
|                    |           | 19    | YP_003776587         | Hsero_3197             | Crp/Fnr family transcription regulator               | <i>fnr1</i> | <i>Herbaspirillum seropedicae</i> SmR1           |
|                    |           | 20    | YP_001100589         | HEAR2336               | <i>fnr</i> gene product                              | <i>fnr</i>  | <i>Hermiiniimonas arsenicoxydans</i>             |
|                    |           | 21    | YP_001353329         | mma_1639               | Crp/FNR family transcriptional regulator             | -           | <i>Janthinobacterium</i> sp. Marseille           |
|                    |           | 22    | YP_001099920         | HEAR1637               | <i>btr</i> gene product                              | <i>btr</i>  | <i>Hermiiniimonas arsenicoxydans</i>             |
|                    |           | 23    | NP_879971            | BP1197                 | <i>btr</i> gene product                              | <i>btr</i>  | <i>Bordetella pertussis</i> Tohama I             |
|                    |           | 24    | NP_942911            | PHG276                 | transcriptional regulator                            | <i>fnr</i>  | <i>Ralstonia eutropha</i> H16                    |
|                    |           | 25    | YP_726776            | H16_A2312              | transcriptional regulator, FNR-like                  | <i>fnr3</i> | <i>Ralstonia eutropha</i> H16                    |
|                    |           | 26    | YP_584185            | Rmet_2037              | <i>fnrL</i> gene product                             | <i>fnrL</i> | <i>Cupriavidus metallidurans</i> CH34            |
|                    |           | 27    | YP_841586            | H16_B2074              | transcriptional regulator, FNR-like                  | <i>fnr5</i> | <i>Ralstonia eutropha</i> H16                    |
|                    |           | 28    | YP_583842            | Rmet_1692              | <i>fnr</i> gene product                              | <i>fnr</i>  | <i>Cupriavidus metallidurans</i> CH34            |
|                    |           | 29    | YP_841057            | H16_B1540              | transcriptional regulator, FNR-like                  | <i>fnr4</i> | <i>Ralstonia eutropha</i> H16                    |
|                    |           | 30    | YP_002799173         | Avin_19910             | <i>cydR</i> gene product                             | <i>cydR</i> | <i>Azotobacter vinelandii</i> DJ                 |
|                    |           | 31    | YP_259029            | PFL_1910               | <i>anr</i> gene product                              | <i>anr</i>  | <i>Pseudomonas fluorescens</i> Pf-5              |
|                    |           | 32    | YP_001750434         | PputW619_3583          | Crp/FNR family transcriptional regulator             | -           | <i>Pseudomonas putida</i> W619                   |
|                    |           | 33    | ZP_05638922          | PsyrptA_020100016591   | transcriptional regulator Anr                        | -           | <i>Pseudomonas syringae</i> pv. tabaci str. ATCC |
|                    |           | 34    | NP_250235            | PA1544                 | <i>anr</i> gene product                              | <i>anr</i>  | <i>Pseudomonas aeruginosa</i> PAO1               |
|                    |           | 35    | ZP_01305649          | RED65_09994            | transcriptional regulator Anr                        | -           | <i>Bermanella marisrubri</i>                     |
|                    |           | 36    | ZP_09189237          | KUC_2859               | Transcriptional activator protein anr                | -           | <i>Halomonas boliviensis</i> LC1                 |
|                    |           | 37    | YP_003145738         | Kkor_0550              | unnamed protein product                              | -           | <i>Kangiella koreensis</i> DSM 16069             |
|                    |           | 38    | YP_004392595         | B565_1943              | fumarate/nitrate reduction transcriptional regulator | -           | <i>Aeromonas veronii</i> B565                    |
|                    |           | 39    | YP_003556912         | SVI_2163               | <i>etrA</i> gene product                             | <i>etrA</i> | <i>Shewanella violacea</i> DSS12                 |
|                    |           | 40    | YP_001760790         | Swoo_2417              | fumarate/nitrate reduction transcriptional regulator | -           | <i>Shewanella woodyi</i> ATCC 51908              |
|                    |           | 41    | ZP_04412887          | VCA_001046             | fumarate and nitrate reduction regulatory protein    | -           | <i>Vibrio cholerae</i> bv. albensis VL426        |
|                    |           | 42    | ZP_02477756          | HPS_05113              | regulatory protein HlyX                              | -           | <i>Haemophilus parasuis</i> 29755                |
|                    |           | 43    | YP_005176618         | Pmu_07350              | <i>fnr</i> gene product                              | <i>fnr</i>  | <i>Pasteurella multocida</i> 36950               |
|                    |           | 44    | YP_003468250         | XBJ1_2353              | <i>fnr</i> gene product                              | <i>fnr</i>  | <i>Xenorhabdus bovienii</i> SS-2004              |

|                    |            |              |               |                                                     |                                                   |                                            |                                                               |
|--------------------|------------|--------------|---------------|-----------------------------------------------------|---------------------------------------------------|--------------------------------------------|---------------------------------------------------------------|
| Alfaproteobacteria | Fixk Group | 45           | YP_002238752  | KPK_2925                                            | fnr gene product                                  | <i>fnr</i>                                 | <i>Klebsiella pneumoniae</i> 342                              |
|                    |            | 46           | NP_415850     | b1334                                               | DNA-binding transcriptional dual regulator        | <i>fnr</i>                                 | <i>Escherichia coli</i> str. K-12 substr. MG1655              |
|                    |            | 47           | NP_769397     | blI2757                                             | fixK gene product                                 | <i>fixk</i>                                | <i>Bradyrhizobium japonicum</i> USDA 110                      |
|                    |            | 48           | YP_568479     | RPD_1340                                            | transcriptional regulator FixK                    | <i>fixk</i>                                | <i>Rhodopseudomonas palustris</i> BisB5                       |
|                    |            | 49           | NP_768749     | blI2109                                             | fixK gene product                                 | <i>fixk</i>                                | <i>Bradyrhizobium japonicum</i> USDA 110                      |
|                    |            | 50           | YP_001682260  | Caul_0629                                           | transcriptional regulator FixK                    | <i>fixk</i>                                | <i>Caulobacter sp.</i> K31                                    |
|                    |            | 51           | ZP_05102573   | RGAI101_3810                                        | FixK1 Transcriptional activator                   | <i>fixk</i>                                | <i>Roseobacter sp.</i> GAI101                                 |
|                    |            | 52           | NP_435913     | SMA1225                                             | transcriptional regulator FixK                    | <i>fixk</i>                                | <i>Sinorhizobium meliloti</i> 1021                            |
|                    |            | 53           | YP_005724846  | SM11_pC0964                                         | fixK1 gene product                                | <i>fixk1</i>                               | <i>Sinorhizobium meliloti</i> SM11                            |
|                    |            | 54           | NP_637170     | XCC1805                                             | fumarate and nitrate reduction regulatory protein | <i>fnr</i>                                 | <i>Xanthomonas campestris</i> pv. <i>campestris</i> str. ATCC |
|                    |            | 55           | AAB58263      | 1                                                   | Fnr-type transcriptional regulator FnrN2          | -                                          | <i>Rhizobium leguminosarum</i> bv. <i>Viciae</i> UPM791       |
|                    |            | 56           | AAA86478      | 2                                                   | FnrN                                              | -                                          | <i>Rhizobium leguminosarum</i> bv. <i>Viciae</i> UPM791       |
|                    | 57         | NP_107101    | mll6632       | Fnr-type transcriptional regulator                  | -                                                 | <i>Mesorhizobium loti</i> MAFF303099       |                                                               |
|                    | 58         | ZP_01742514  | RB2150_17129  | Crp-Fnr regulatory protein (FnrL)                   | -                                                 | <i>Rhodobacteraceae bacterium</i> HTCC2150 |                                                               |
|                    | 59         | ZP_00956255  | EE36_11304    | Crp-Fnr regulatory protein (FnrL)                   | -                                                 | <i>Sulfitobacter sp.</i> EE-36             |                                                               |
|                    | 60         | NP_772701    | blI6061       | fixK gene product                                   | <i>fixk</i>                                       | <i>Bradyrhizobium japonicum</i> USDA 110   |                                                               |
|                    | 61         | YP_005608508 | BJ6T_36460    | fixK gene product                                   | <i>fixk</i>                                       | <i>Bradyrhizobium japonicum</i> USDA 6     |                                                               |
|                    | 62         | ZP_08628885  | CSIRO_1970    | transcriptional regulator, Crp/Fnr family           | -                                                 | <i>Bradyrhizobiaceae bacterium</i> SG-6C   |                                                               |
|                    | 63         | CCD01536     | AZOBR_p210200 | transcriptional activatory protein aadR             | <i>aadR</i>                                       | <i>Azospirillum brasilense</i> Sp245       |                                                               |
|                    | 64         | YP_004974940 | AZOLI_p20689  | Crp family transcriptional regulator                | -                                                 | <i>Azospirillum lipoferum</i> 4B           |                                                               |
|                    | 65         | YP_001592512 | BCAN_A0667    | transcriptional activator protein fnrA              | <i>fnrA</i>                                       | <i>Brucella canis</i> ATCC 23365           |                                                               |
|                    | 66         | YP_002540637 | Arad_7576     | nitrogen fixation transcriptional regulator protein | <i>fixkf</i>                                      | <i>Agrobacterium radiobacter</i> K84       |                                                               |
|                    | 67         | ZP_08870168  | AZA_90412     | Transcriptional activator protein Anr               | -                                                 | <i>Azospirillum amazonense</i> Y2          |                                                               |
|                    | 68         | YP_005040097 | AZOLI_2692    | fixK gene product                                   | <i>fixk</i>                                       | <i>Azospirillum lipoferum</i> 4B           |                                                               |

<sup>a</sup> NCBI reference sequence number

<sup>b</sup> Locus Tags are given for all organisms that have complete genome deposited in NCBI database until June 2012. The sequences identified with NCBI reference sequence numbers AAB58263 and AAA86478 were subject of independent deposition in NCBI database in 24-FEB-1997 (1) and 15-DEC-1994 (2), respectively.

**Supplementary Table S3: Primers used in this study**

| Primer  | Restriction Site | Sequence (5'→3') <sup>a</sup>   | Genome Position <sup>b</sup> | Application                                                                       | Source                |
|---------|------------------|---------------------------------|------------------------------|-----------------------------------------------------------------------------------|-----------------------|
| 1DA+    | HindIII          | TGCATCA <b>AAGCTT</b> GTGTGGTA  | From 3659172 to 3659191      | Cloning 198 bp upstream to <i>fnr1</i> plus 294 bp of the 5' coding region        | This work             |
| 1DA-    | XhoI             | GCCGTC <b>CTCGAG</b> TCCTGATA   | From 3659664 to 3659684      |                                                                                   |                       |
| 1DB+    | XhoI             | GTGAAC <b>CTCGAG</b> TCACGCTAC  | From 3659952 to 3659972      | Cloning 245 bp downstream to <i>fnr1</i> plus 255 bp of the 3' coding region      | This work             |
| 1DB-    | BamHI            | TCTTTT <b>GGATCC</b> CAACCCG    | From 3660432 to 3660451      |                                                                                   |                       |
| 2DA+    | HindIII          | GGAACAA <b>AAGCTT</b> TCAGCAGC  | From 2710337 to 2710356      | Cloning 333 bp upstream to <i>fnr2</i> plus 279 bp of the 5' coding region        | This work             |
| 2DA-    | XhoI             | GGTATG <b>CTCGAG</b> GGCAATCAC  | From 2710928 to 2710948      |                                                                                   |                       |
| 2DB+    | XhoI             | AATGCC <b>CTCGAG</b> GAATTCTCG  | From 2711216 to 2711236      | Cloning 357 bp downstream to <i>fnr2</i> plus 273 bp of the 3' coding region      | This work             |
| 2DB-    | BamHI            | AGGTTG <b>GGATCC</b> TGGTGGAAAG | From 2711825 to 2711845      |                                                                                   |                       |
| 3DA+    | HindIII          | ACTGGA <b>AAGCTT</b> GGCCTATG   | From 2891852 to 2891871      | Cloning 315 bp upstream to <i>fnr3</i> plus 255 bp of the 5' of the coding region | This work             |
| 3DA-    | XhoI             | CTGGAAGGT <b>CTCGAG</b> ATGGCC  | From 2892401 to 2892421      |                                                                                   |                       |
| 3DB+    | XhoI             | ATGACGGCG <b>CTCGAG</b> AAGATG  | From 2892671 to 2892691      | Cloning 315 bp downstream to <i>fnr3</i> plus 264 bp of the 3' coding region      | This work             |
| 3DB-    | BamHI            | GTATAGCC <b>GGATCC</b> AGTTCCG  | From 2893229 to 2893249      |                                                                                   |                       |
| PFNP    | PstI             | TGGAAG <b>CTGCAG</b> ATCTCCTCAT | From 3666293 to 3666314      | Amplify 360 bp of the promoter region of <i>fixNXOP</i> operon                    | This work             |
| PFNB    | BglII            | ATTGGCG <b>AGATCT</b> GTGTAGTT  | From 3665955 to 3665976      |                                                                                   |                       |
| PHNP    | PstI             | TTAACATTG <b>CTGCAG</b> TTGGGCT | From 3671461 to 3671440      | Amplify 367 bp of the promoter region of <i>hemNHsero_3206fixIS</i> operon        | This work             |
| PHNB    | BglII            | TCTTGTTCA <b>AGATCT</b> CGAGACT | From 3671095 to 3671116      |                                                                                   |                       |
| 1F      | None             | ACCAGTTGTGCCTGCCCA              | From 3659509 to 3659526      | Confirmation of cloning and mutations                                             | This work             |
| 1R      | None             | CTGCTTGCGGAAGTTGGA              | From 3660075 to 3660089      |                                                                                   |                       |
| 2F      | None             | CAATGACCTGAGTAAGCGT             | From 2710684 to 2710702      | Confirmation of cloning and mutations                                             | This work             |
| 2R      | None             | GAAGTTGCTGATGAGGCG              | From 2711297 to 2711314      |                                                                                   |                       |
| 3F      | None             | TTCCACCCACAAGCATTC              | From 2892184 to 2892201      | Confirmation of cloning and mutations                                             | This work             |
| 3R      | None             | TGAAGTTGGTCAGCAGGC              | From 2892819 to 2892836      |                                                                                   |                       |
| pmpfor  | None             | GCTCACCCCAAAAATGGCA             | Not applicable               | Confirmation of plasmidial <i>lacZ</i> transcriptional fusions                    | Wassem, R unpublished |
| laczrev | None             | GCAAGGCGATTAAGTTGGGT            | Not applicable               |                                                                                   |                       |

<sup>a</sup>Highlighted in bold are the sequences of restriction sites inserted in the primers

<sup>b</sup>Positions of primers annealing are given for *H.seropedicae* SmR1 genome

## Supplementary References

1. Gutiérrez, D., Hernando, Y., Palacios, J.M., Imperial, J. & Ruiz-Argüeso, T. FnrN controls symbiotic nitrogen fixation and hydrogenase activities in *Rhizobium leguminosarum biovar viciae* UPM791. *J. Bacteriol.* **179**, 5264-5270 (1997).
2. Hernando, Y., Palacios, J.M., Imperial, J. & Ruiz-Argüeso, T. The *hypBFCDE* operon from *Rhizobium leguminosarum biovar viciae* is expressed from an Fnr-type promoter that escapes mutagenesis of the *fnrN* gene. *J. Bacteriol.* **177**, 5661-5669 (1995).
3. Simon, R., Prieffer, U. & Puhler, A. A broad host range mobilization system for in vitro genetic engineering, transposon mutagenesis in Gram-negative bacteria. *Nat. Biotechnol.* **1**, 784-791 (1983).
4. Souza, E.M., Pedrosa, F.O., Rigo, L.U., Machado, H.B. & Yates, M.G. Expression of the *nifA* gene of *Herbaspirillum seropedicae*, role of the NtrC and NifA binding sites and of the -24/-12 promoter element. *Microbiology* **146**, 1407-1418 (2000).
5. Hynes, M.F., Quandt, J., Oconnell, M.P. & Puhler, A. direct selection for curing and deletion of Rhizobium plasmids using transposons carrying the *Bacillus subtilis sacB* gene. *Gene* **78**, 111-120 (1989).



6. Woodley, P., Buck, M., & Kennedy, C. Identification of sequences important for recognition of *vnf* genes by the VnfA transcriptional activator in *Azotobacter vinelandii*. *FEMS Microbiol. Lett.* **135**, 213-22 (1996).
7. Dennis, J. J. & Zylstra, G. J. Plasposons, modular self-cloning mini-transposon derivatives for the rapid genetic analysis of gram-negative bacterial genomes. *Appl. Environ. Microbiol.* **64**, 2710–2715 (1998).
8. Pedrosa, F.O. *et al.* Genome of *Herbaspirillum seropedicae* strain SmR1, a specialized diazotrophic endophyte of tropical grasses. *PLoS Genet.* **7**, e1002064. doi, 10.1371/journal.pgen.1002064 (2011).
